# Supplementary material for: Halogens in Eclogite Facies Minerals from the Western Gneiss Region, Norway
Source: MDPI journal article supplement (doi:10.3390/min11070760), 2021-07-14
Supplement: s1 [file s1]

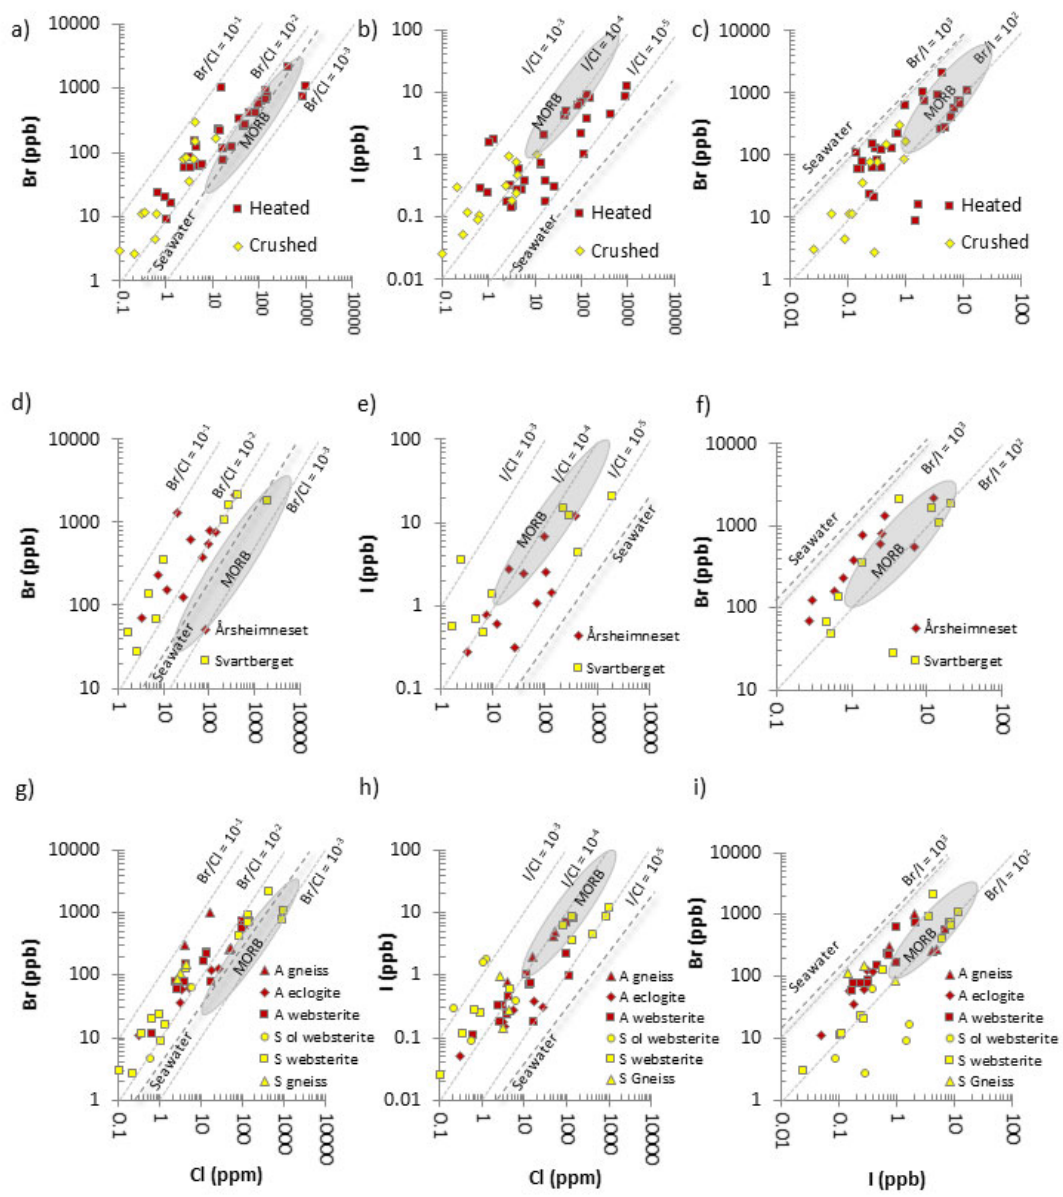

**Figure S1.** (a) Br/Cl, (b) I/Cl and (c) Br/I ratios extended. (d–f) crushing vs. heating. (g–i) Årsheimneset vs. Svartberget localities.
