# Supplementary material for: Halogens in Eclogite Facies Minerals from the Western Gneiss Region, Norway
Source: MDPI journal article supplement (doi:10.3390/min11070760), 2021-07-14
Supplement: s1 [file s1]

**Table S7.** Irradiation details. Details of the nuclear irradiation carried-out in the Petten high fluence reactor in 2012 [10].

| <b>Irradiation</b>                                | <b>MN2012f</b>                   |
|---------------------------------------------------|----------------------------------|
| <b>Reactor</b>                                    | Petten                           |
| <b>Date</b>                                       | 24/07/2012                       |
| <b>Duration</b>                                   | 24 hours                         |
| <b># of Hb3gr</b>                                 | 10                               |
| <b>J<sup>a</sup></b>                              | $0.00626 \pm 0.00011$            |
| <b>Thermal<sup>b</sup> (n·cm<sup>-2</sup>)</b>    | $(6.34 \pm 0.09) \times 10^{18}$ |
| <b>Epithermal<sup>c</sup> (n·cm<sup>-2</sup>)</b> | $(1.38 \pm 0.19) \times 10^{17}$ |
| <b>f<sup>d</sup></b>                              | $39.4 \pm 6.4$                   |
| <b>Alpha<sup>e</sup></b>                          | $0.50 \pm 0.03$                  |
| <b>Beta<sup>f</sup></b>                           | $9.8 \pm 0.5$                    |

<sup>a</sup> Calculated from  $J = \frac{(e^{\lambda t_m} - 1)}{Ar} \cdot \frac{1}{^{39}Ar}$ ; <sup>b</sup> Calculated from the thermal fluence

$\varphi_{th} = \frac{\beta \cdot J}{(M_K/M_{Cl}) \cdot (K/^{40}K) \cdot (\lambda/\lambda_e) \cdot \sigma_{37Cl} \cdot (^{37}Cl/Cl)}$ ; <sup>c</sup> The epithermal fluence has been calculated using Shal-

lowater [126]; <sup>d</sup>  $f = \varphi_{th} / \varphi_{epi}$ , with  $\varphi_{th}$  and  $\varphi_{epi}$  being the thermal and epithermal neutron fluences, respectively; <sup>e</sup> Calculated from the Hb3gr monitor  $\frac{K}{Ca} = \alpha \frac{^{39}Ar_K}{^{37}Ar_{Ca}}$  [127]; <sup>f</sup> Calcu-

lated from the Hb3gr monitor  $\frac{K}{Cl} = \beta \frac{^{39}Ar_K}{^{37}Ar_{Cl}}$  [128].
